# Supplementary material for: Potential Nosocomial Infections by the Zika and Chikungunya Viruses in Public Health Facilities in the Metropolitan Area of Recife, Brazil
Source: MDPI journal article supplement (doi:10.3390/tropicalmed7110351), 2022-11-04
Supplement: s1 [file s1]

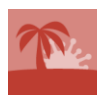

Article

# Potential Nosocomial Infections by the Zika and Chikungunya Viruses in Public Health Facilities in the Metropolitan Area of Recife, Brazil

Larissa Krokovsky <sup>1</sup>, Duschinka Ribeiro Duarte Guedes <sup>1</sup>, Fabiana Cristina Fulco Santos <sup>1</sup>, Kamila Gaudêncio da Silva Sales <sup>2</sup>, Daniela Anastácio Bandeira <sup>3</sup>, Claudenice Ramos Pontes <sup>3</sup>, Walter Soares Leal <sup>4</sup>, Constância Flávia Junqueira Ayres <sup>1</sup> and Marcelo Henrique Santos Paiva <sup>1,5,\*</sup>

<sup>1</sup> Entomology Department, Aggeu Magalhães Institute, Oswaldo Cruz Foundation, Recife, 50740-465, PE, Brazil

<sup>2</sup> Immunology Department, Aggeu Magalhães Institute, Oswaldo Cruz Foundation Recife, 50740-465, PE, Brazil

<sup>3</sup> Pernambuco's Health Department, Recife, 50751-530, PE, Brazil

<sup>4</sup> Department of Molecular and Cellular Biology, University of California, Davis, CA 95616, USA

<sup>5</sup> Life Sciences Center, Agreste Academic Center, Federal University of Pernambuco, Caruaru, 55002-970, PE, Brazil

\* Correspondence: marcelo.paiva@fiocruz.br; Tel.: +55-81-21012552

**Table S1.** Primers and probes sequences used in DENV, CHIKV and ZIKV detection.

| Virus | Dye | Oligonucleotide Name | Sequence (5'–3')                        | Amplicon Size (bp) | Reference |
|-------|-----|----------------------|-----------------------------------------|--------------------|-----------|
| DENV  | CY5 | DENVG-F              | AAGGACTAGAGGTTAGAGGAGACCC               | 108                | [1]       |
|       |     | DENVG-R              | CGTTCTGTGCCTGGAATGATG                   |                    |           |
|       |     | DENVG-P              | CY5-AACAGCATATTGACGCTGGGAGAGACCAGA-MGB  |                    |           |
| ZIKV  | FAM | ZIKV 1163c           | CCACTAACGTTCTTTTGCAGACAT                | 77                 | [2]       |
|       |     | ZIKV 1087            | CCGCTGCCCAACACAAG                       |                    |           |
|       |     | ZIKV 1108 P          | FAM-AGCCTACCTTGACAAGCAGTCAGACACTCAA-MGB |                    |           |
| CHIKV | VIC | CHIKV 6856           | TCACTCCCTGTTGGACTTGATAGA                | 126                | [3]       |
|       |     | CHIKV 6981           | TTGACGAGAGTTAGGAACATAACC                |                    |           |
|       |     | CHIKV 6919 P         | VIC-AGGTACGCGCTTCAAGTTCGGCG-BHQ1        |                    |           |

**Table S2.** Linear regression analysis values of standard curves for DENV, ZIKV and CHIKV in singleplex and multiplex assays.

| Virus | Parameters     | RT-qPCR Assays |           |
|-------|----------------|----------------|-----------|
|       |                | Singleplex     | Multiplex |
| DENV  | Slope          | −3.608         | −3.362    |
|       | R <sup>2</sup> | 0.997366667    | 0.998     |
|       | E%             | 89.398         | 98.369    |
|       | Y-inter        | 60.88          | 59.899    |
| ZIKV  | Slope          | −3.536         | −3.406    |
|       | R <sup>2</sup> | 0.997          | 0.996     |
|       | E%             | 91.799         | 96.610    |
|       | Y-inter        | 62.75          | 62.30     |
| CHIKV | Slope          | −3.497799953   | −3.448    |
|       | R <sup>2</sup> | 0.994066676    | 0.996     |
|       | E%             | 93.2           | 95.118    |
|       | Y-inter        | 61.50          | 62.589    |

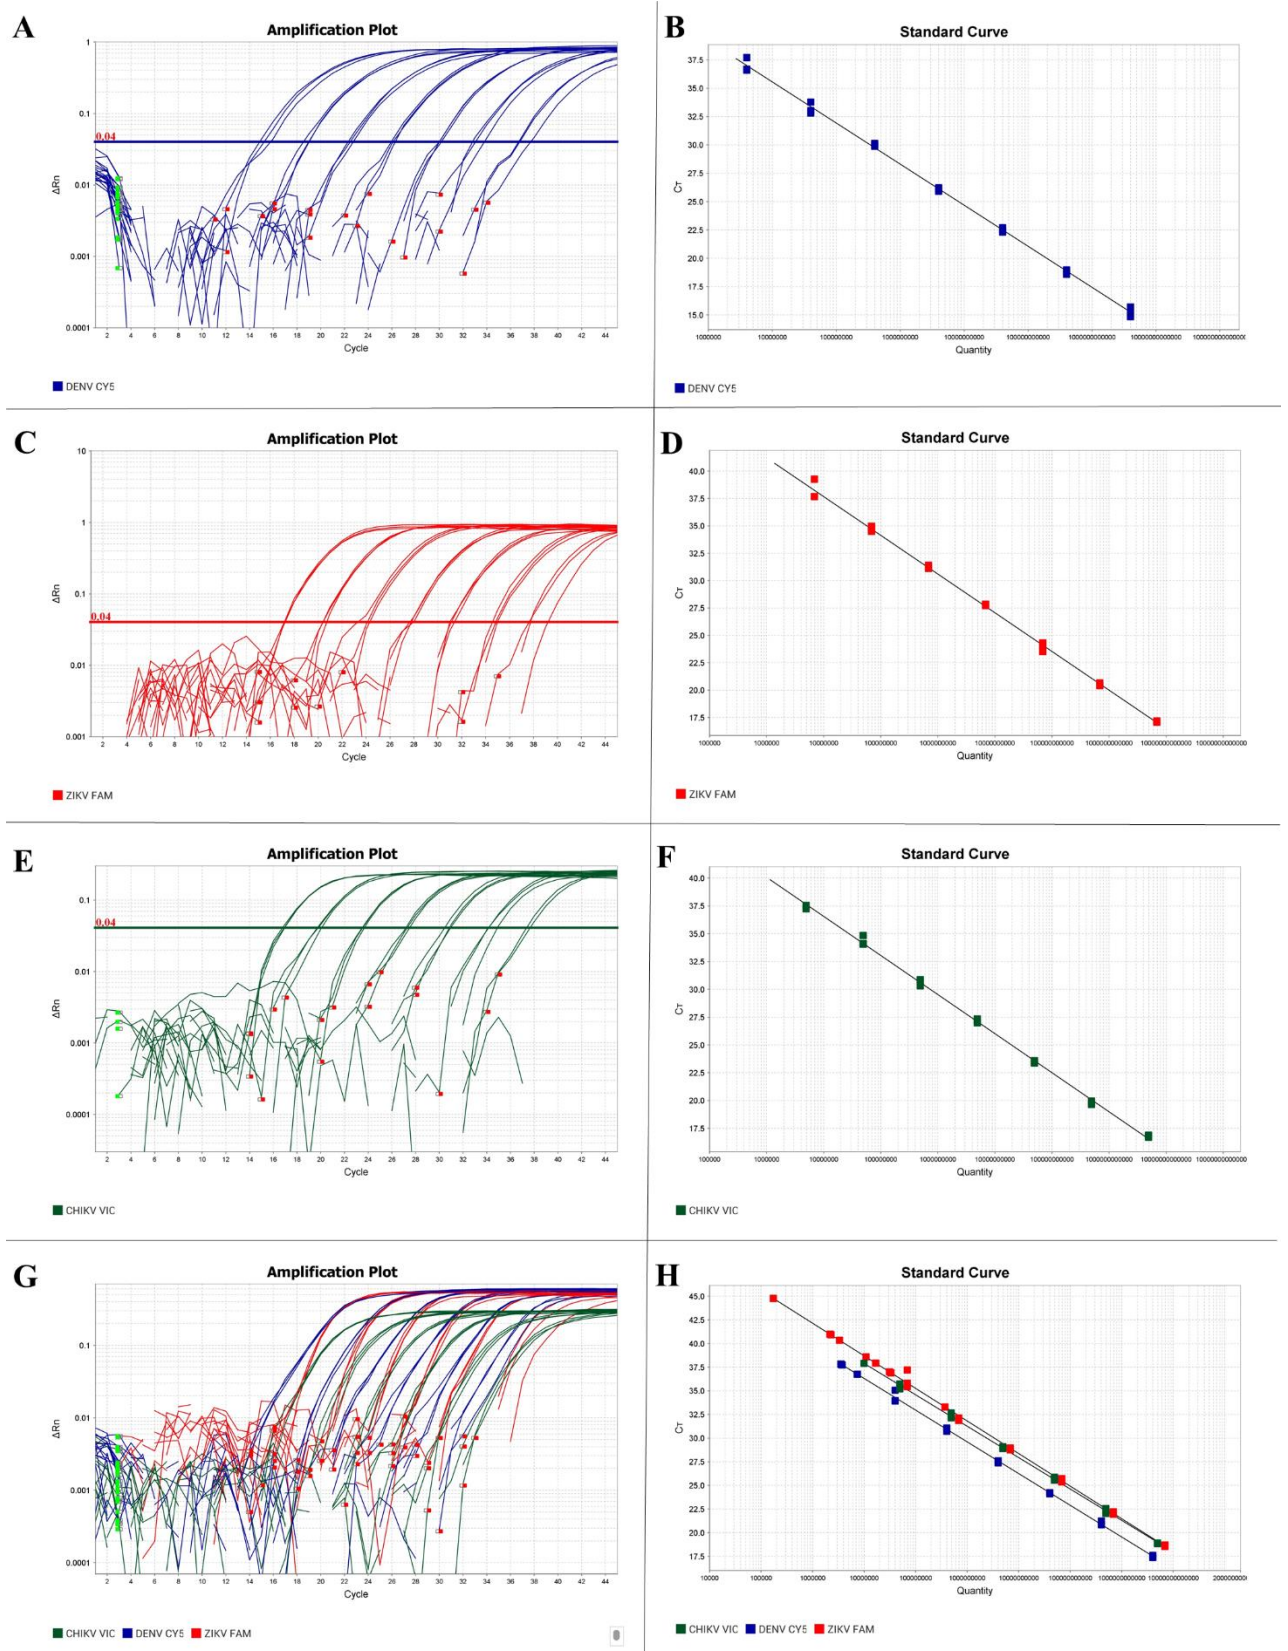

**Figure S1.** Amplification plot and standard curve of the singleplex and multiplex real-time RT-PCR assays. **A–B:** Singleplex for DENV; **C–D:** Singleplex for ZIKV; **E–F:** Singleplex for CHIKV; **G–H:** Multiplex for DENV, ZIKV and CHIKV. .

## References

1. Magalhaes, T.; Braga, C.; Cordeiro, M.T.; Oliveira, A.L.S.; Castanha, P.M.S.; Maciel, A.P.R.; Amancio, N.M.L.; Gouveia, P.N.; Peixoto-da-Silva, V.J.; Peixoto, T.F.L.; et al. Zika Virus Displacement by a Chikungunya Outbreak in Recife, Brazil. *PLoS Negl Trop Dis* **2017**, *11*, e0006055, doi:10.1371/journal.pntd.0006055.
2. Lanciotti, R.S.; Kosoy, O.L.; Laven, J.J.; Velez, J.O.; Lambert, A.J.; Johnson, A.J.; Stanfield, S.M.; Duffy, M.R. Genetic and Serologic Properties of Zika Virus Associated with an Epidemic, Yap State, Micronesia, 2007. *Emerg Infect Dis* **2008**, *14*, 1232–1239, doi:10.3201/eid1408.080287.
3. Lanciotti, R.S.; Kosoy, O.L.; Laven, J.J.; Panella, A.J.; Velez, J.O.; Lambert, A.J.; Campbell, G.L. Chikungunya Virus in US Travelers Returning from India, 2006. *Emerg Infect Dis* **2007**, *13*, 764–767, doi:10.3201/eid1305.070015.
